# Supplementary material for: In Silico Analysis of Genetic VapC Profiles from the Toxin-Antitoxin Type II VapBC Modules among Pathogenic, Intermediate, and Non-Pathogenic Leptospira
Source: PubMed Central journal article supplement (PMC6406750; doi:10.3390/microorganisms7020056), 2019-02-20
Supplement: microorganisms-07-00056-s001.pdf [file microorganisms-07-00056-s001.pdf]

## Figure S1

### ***Leptospira interrogans* serovar Copenhageni str. Fiocruz L1-130**

>LIC-VapC1

MKDKVFLDTNLFYINFDTENKTKHEKSKEIVLTALAENNYVISYQVIQEFNSVALKKFQIPLKPKDLAIY  
LKRVMFPLCSVYYTNENILNAIEIRNRYKLSFYDSVLIGSAIEANCKTLLSEDLQDGLQIKGLQITNPFN  
STIKKKK

>LIC-VapC2

MKYLLDVNVLISLCSNHVFHEKAWKWFDRKARNGWATCPITQNALVRIMSHSSYPGNPGGVEVVSAILH  
SLLKVKGHQFIPDNISINSSLFYLNIVSVSSKQITDVYLLALSVMHVKVFATFDSKI PYDSVDRGKEHLE  
LIAA

>LIC-VapC3

MYLLDTNICIFLIKKKNATLLENLKKKLNKDLFVSSLTVAELEFGIQKSEFKEKNKVALIEFLTIFNILS  
FSDKDAESYGIIRADLERKGNVIGSIDMLLAAQAIANNYIFVTNNTKEFKRIKALKIENWTQ

>LIC-VapC4

MKYLLDTHVILWII GSSNLLSKKAKATIENSENKIYVSSVSLWEISLKFRLGKLSLSGMKPSQIPEILSK  
SNIETINLESADASTYDQLKVIHHRDPFDRMLIWQCILRKFTLISKDSKMKKYRSHGLKTLW

### ***Leptospira borgpetersenii* serovar Hardjo-bovis str. JB197**

>LBJ\_0624-VapC1

MNYFLDTNICIYFLKKGGENIEKNIRKLNPNRIKIPSVVKAELLLGAFKSNDQKKNRESVLSFLDPFEII  
GFNDIESEIYAEVRSGLIEIQGIPIGPNDLLVASVVLSSNGILVTNNEKEFKMIPNLKIENWL

>LBJ\_0764-VapC2

MPVYIDTSFFLSIIFEDTNYELSYESWIGDDYRFSSSLGIESFVNIHKVYRENKVLNKRWLDESLTRQ  
RELLTVINLKRIGSEVYEKIQKTEKLTFLKSLDSII

>LBJ\_2077-VapC3

MRIVLDANVIISALISNGLSHQVVDICIDDHEVFMSKALNTEVLNFFVVRKVKTTIDEKHRIAKFLDELGP  
EIVPKGKPPVICRDKNDNHVLHLVQTCSARILISGDQLLVLLKKHEHTPIILTPRQFLEVLNSGKLDGENF  
A

### ***Leptospira biflexa* serovar Patoc strain Patoc 1 (Ames)**

>LBF-VapC1

MKYLLDTQIFIFALENPTMIPPKIRKVLESFESELFVSDVSVWEMIIKASIKKLFKSDIKQVITKGYDV  
LGANDLLIQKSHIFRSMTLPFHKKDPFDRLLASQALEEDLLFLTDDVIFKKYKVKVL

>LBF-VapC2

MSYLIDTDIILYSLKGNKQNNLIEKKNISKVISVITYGELIFGAKKSKSREKNLATVYRIGELFPVIE  
LTKGIVETFGEVKATVQKKGNTVDDFDLLIGSTALFLNYTLVTNNEKHFSLIPDLKIENWSK

>LBF-VapC7

MKNVALIDSGPIIALFNEKDKFHKSILKYLSFKGELISSWPVVTEVIYLLSFSVEAQSDFLEWIERGGI  
QIFNLSIEDLKYIKSRMKKYSDLPMDLADASLMCIAEKFEYENIISIDSDFSIYKTVKGFRLNLYHV

>LBF-VapC8

MNHYLDTNICIYIINKKPENVYQKFKKISLDNIFISSITEFELRYGVQKSQKADKNQKTLNEFLGYLNV  
INFDESASVAGTIRTKLEKKGEIIGPYDLLIASQAIASDIILVTNNEKEYKRIKELKIENWIN

***Leptospira licerasiae* serovar Varillal str. VAR 010**

>LEP1GSC185\_0307-VapC1

MIVLDTHAWIWLMEGDPRMEKEPILRKLYRHIHRGIFISEISGWEVGMVAKKRIQISGTLNRWLQDAY  
NAPGIQPYNLSPEVIVESVNLPSDFHGDPADRIIVATARVLNAELVTKDKEIIKYGKKGNLKVISL

>LEP1GSC185\_0418-VapC2

MRTILLDTQIILWFLLEDPKLPPIIKELCKEEDTRLLFHQVSLWEIQIKYDLGKLPPEMPGYFLVNACV  
QSGLEKSAMQDEAIFFLTRLPNIHRDPFDRLLLSHAMINGWEFATTDEILKKYPVRILENIKT

>LEP1GSC185\_0630-VapC3

MVLYIDTSLLLNILYAEAGYQDHLDFNRSCLKFGSILLEIESFRSLHFTYSKEGKSLPKTWFKDAESFL  
GEFISQINLKNLDADIRTEIQKNKEVLELKS LDA AHL LATA LHIRKSISDDLILCSMDEKFRSVAKKMGFK  
LYPKK

>LEP1GSC185\_1922-VapC4

MTAVLVDTSVWINHLRRSDPKLVELLHQGLVRRHPMVEGELSLGNFKNKNSFLTEYALLKEVPIANHKET  
MIFSERNSLAGLGIGWIDAH LLASCILGSAKLYSADLSLVKAAEKIGIAEITT

>LEP1GSC185\_2251-VapC5

MNYLLDTHAILWVLFQPENLSYKVESEILNHRNRIFISSISLWEISLKFSLRKIDLQGITPEQLPRKIRE  
AGFEFIEDSPEIFANYFKLPTGKHTDPFDRFLVWQAVSFKFVFITKDRYLKEYNPLGLRLFW

>LEP1GSC185\_2580-VapC6

MSYLIDTDIIIIYSLKEDPIVRQNFLDRKNSIKLSVITYGELIFGAQKSTYKERNLATVRRIAELFPVIQ  
LTEGIMETYGELKAIQQKKGNTVEDFDLLIGSTALYLNYYTLVTNNEKHFKIIPGLRMENWAYVT

>LEP1GSC185\_3193-VapC7

MKIVLDTNVLLSSYLFQGYTAEVFDHVWLNHEIILSEWILTEFKEVCSRKFKEVDIREVLDHLRGGAK  
VYQPKGRPPKVCADPDDDNILHIAEFSKSDWILSGDSLLKLLKQFKIEIISPREYKLLKFLV

>LEP1GSC185\_3530-VapC8

MLKVLIDTNVYISAILFGGKPKVILEELISGKIIGYISDSILKEIEETLKKPKFKLSEEFISIVLSEIES  
LTEKIVNISLKDYAGLRDRDDYHILESASAKVDYLITGDQLLVKLNKSLKIIISPEQYLSLDSSGASS  
V

```

>LEP1GSC185_3561-VapC13
MNIVDSSGWLEYFAGTKRSALFSEAIEKTDKLFVPTISLYEVFKKIYLERDEDSALRAIAHMQQGTVIDL
DASISIFAAKLSKDHKIPMADSIILATARKYNAILWTQDDDFIGLDGVKYFPKK

>LEP1GSC185_3566-VapC14
MILVDTSVWIEFFRGNDPHFGELKELIESSEVIVHEVVFGEELLQGCKNKTEVSFILEYWENLNTLTSDGS
FLLAGKLSFENKHIDKGIGLIDSVLINEVRSKKLQLWTLDKKILKVLDKKEIYSSRGKHVG

>LEP1GSC185_3880-VapC15
MLKVLIDTNVYISAILFGGKPKVILEELISGKIIGYISDSILKEIEETLKKPKFKLSEEFISIVLSEIES
LTEKIVNISLKDYAGLRDRDDYHILESASAKVDYLITGDQDLLVLKLNKSLKIIISPEQYLSLDSSGASS
V

```

**Figure S1:** Amino acid sequence of VapCs.

**Table S1:** Comparison of the TAs sets of *L. borgpetersenii* serovar Hardjo-bovis strain JB197 and strain L550

| <i>Leptospira borgpetersenii</i> serovar Hardjo-bovis str. JB197 chromosome I |                                       | <i>Leptospira borgpetersenii</i> serovar Hardjo-bovis str. L550 chromosome I |                                       |
|-------------------------------------------------------------------------------|---------------------------------------|------------------------------------------------------------------------------|---------------------------------------|
| TA Number                                                                     | Location/Family/Domain                | TA Number                                                                    | Location/Family/Domain                |
| 1                                                                             | 492171..492736/mazEF/AbrB-MazF        | 9                                                                            | 3169547..3170112 /mazEF/AbrB-MazF     |
| 2                                                                             | 754634..755259/vapBC/RHH-PIN          | 8                                                                            | 2907078..2907703/vapBC/RHH-PIN        |
| 3                                                                             | 921329..921957/vapBC/PHD-PIN          | 7                                                                            | 2740091..2740719/vapBC/PHD-PIN        |
| 4                                                                             | 1035975..1036644/ - /cd09981-PRK13696 | 6                                                                            | 1038972..1039641/vapBC/PRK13696-PIN   |
| 5                                                                             | 2250717..2252513/ - /COG3146-cd00090  | 5                                                                            | 1609875..16098441/ - /COG3146-cd00090 |
| 6                                                                             | 2448699..2448702/vapBC/RHH            | 4                                                                            | 113446..1135086/vapBC/RHH-PIN         |
| 7                                                                             | 3032705..3033037/ - /MNT-HEPN         | 3                                                                            | 641016..640990/ - /MNT-HEPN           |
| 8                                                                             | 3121041..3121588/ - /COG2929-RHH      | 2                                                                            | 552751..552754/ - /COG2929-RHH        |
| 9                                                                             | 327738..3237751/ - /COG3832-ArsR      | 1                                                                            | 403008..403788/ - /COG3832-ArsR       |

**Table S2:** Comparison of the TAs sets of *L. biflexa* serovar Patoc strain Patoc 1 (Ames) and strain Patoc 1 (Paris)

| <i>L. biflexa</i> serovar Patoc strain Patoc 1 (Ames) |                                      | <i>L. biflexa</i> serovar Patoc strain Patoc 1 (Paris) |                                      |
|-------------------------------------------------------|--------------------------------------|--------------------------------------------------------|--------------------------------------|
| TA Number                                             | Location/Family/Domain               | TA Number                                              | Location/Family/Domain               |
| 1                                                     | 208150..208954/ - /ArsR-COG3832      | 1                                                      | 204108..204912/ - /ArsR-COG3832      |
| 2                                                     | 428813..429605/ - /ArsR-COG3832      | 2                                                      | 423243..424035/ - /ArsR-COG3832      |
| 3                                                     | 432830..433456/ vapBC /PHD-PIN       | 3                                                      | 427260..427886/ vapBC /PHD-PIN       |
| 4                                                     | 652599..653253/ - /HEPN-MNT          | 4                                                      | 647104..647683/ - /HEPN-MNT          |
| 5                                                     | 762599..763164/ mazEF /AbrB-MazF     | 5                                                      | 757029..757594/ mazEF /AbrB-MazF     |
| 6                                                     | 2290126..2290820/ relBE /Xre-RelE    | 6                                                      | 2284740..2285434/ relBE /Xre-RelE    |
| 7                                                     | 2292479..2293160/ vapBC /COG2886-PIN | 7                                                      | 2287093..2287774/ vapBC /COG2886-PIN |
| 8                                                     | 2307062..2307723/ relBE /Xre-RelE    | 8                                                      | 2301676..2302337/ relBE /Xre-RelE    |
| 9                                                     | 2317508..2318144/ relBE /Xre-RelE    | 9                                                      | 2312122..2312758/ relBE /Xre-RelE    |
| 10                                                    | 2322690..2323354/ vapBC /RHH-PIN     | 10                                                     | 2317304..2317968/ vapBC /RHH-PIN     |
| 11                                                    | 2325925..2326536/ phd-doc /AbrB-Fic  | 11                                                     | 2320539..2321150/ phd-doc /AbrB-Fic  |
| 12                                                    | 2328778..2329439/ vapBC /RHH-PIN     | 12                                                     | 2323392..2324053/ vapBC /RHH-PIN     |
| 13                                                    | 2329722..2330350/ vapBC /AbrB-PIN    | 13                                                     | 2324336..2324964/ vapBC /AbrB-PIN    |
| 14                                                    | 2330621..2331281/ relBE /Xre-RelE    | 14                                                     | 2325235..2325895/ relBE /Xre-RelE    |
| 15                                                    | 2334551..2335149/ relBE /Xre-RelE    | 15                                                     | 2329164..2329762/ relBE /Xre-RelE    |
| 16                                                    | 2336628..2337332/ relBE /Xre-RelE    | 16                                                     | 2331241..2331945/ relBE /Xre-RelE    |
| 17                                                    | 2422710..2423445/ vapBC /RHH-PIN     | 17                                                     | 2417379..2418114/ vapBC /RHH-PIN     |
| 18                                                    | 2985341..2986203/ - /ArsR-COG3832    | 18                                                     | 2976955..2977817/ - /ArsR-COG3832    |
| 19                                                    | 3019939..3020593/ vapBC /RHH-PIN     | 19                                                     | 3011553..3012207/ vapBC /RHH-PIN     |
| 20                                                    | 3178445..3178762/ vapC/ PIN          | 20                                                     | 3169797..3170385/ - /RHH-COG2929     |
| 21                                                    | 3186177..3186756/ mazEF /RHH-MazF    | 21                                                     | 3177800..3178379/ mazEF /RHH-MazF    |
| 22                                                    | 3459352..3460666/ - /ArsR-COG3832    | 22                                                     | 3450975..3452289/ - /ArsR-COG3832    |
| 23                                                    | 3530394..3531025/ vapBC /AbrB-PIN    | 23                                                     | 3522044..3522675/ vapBC /AbrB-PIN    |

**Table S3:** BLAST analysis of VapCs of *L. borgpetersenii* serovar Hardjo-bovis strain JB197.

| VapC of <i>L. borgpetersenii</i> serovar Hardjo-bovis str. JB197 |                          |                 |               |           |         |                 |               |           |         |                 |               |           |         |
|------------------------------------------------------------------|--------------------------|-----------------|---------------|-----------|---------|-----------------|---------------|-----------|---------|-----------------|---------------|-----------|---------|
| <i>Leptospira</i> spp                                            |                          | LBJ_0624 VapC-1 |               |           |         | LBJ_0764 VapC-2 |               |           |         | LBJ_2077 VapC-3 |               |           |         |
|                                                                  |                          | Identity (%)    | Positives (%) | Cover (%) | C-value | Identity (%)    | Positives (%) | Cover (%) | C-value | Identity (%)    | Positives (%) | Cover (%) | C-value |
| Pathogenic                                                       | <i>L. interrogans</i>    | 93              | 96            | 100       | 0.95    | 88              | 94            | 99        | 0.90    | 33              | 54            | 90        | 0.39    |
|                                                                  | <i>L. kirschneri</i>     | 43              | 58            | 98        | 0.49    | 85              | 95            | 99        | 0.89    | 31              | 54            | 90        | 0.38    |
|                                                                  | <i>L. noguchii</i>       | 91              | 95            | 100       | 0.93    | -               | -             | -         | -       | 31              | 55            | 91        | 0.39    |
|                                                                  | <i>L. borgpetersenii</i> | 100             | 100           | 100       | 1.00    | 100             | 100           | 100       | 1.00    | 100             | 100           | 100       | 1.00    |
|                                                                  | <i>L. weilii</i>         | 92              | 95            | 100       | 0.94    | 85              | 94            | 99        | 0.89    | 95              | 96            | 100       | 0.96    |
|                                                                  | <i>L. santarosai</i>     | 40              | 61            | 97        | 0.49    | 83              | 93            | 99        | 0.87    | 32              | 55            | 91        | 0.40    |
|                                                                  | <i>L. alexanderi</i>     | 46              | 59            | 99        | 0.52    | 91              | 98            | 51        | 0.48    | -               | -             | -         | -       |
|                                                                  | <i>L. alstoni</i>        | 94              | 96            | 100       | 0.95    | 85              | 93            | 99        | 0.88    | 33              | 56            | 99        | 0.44    |
| Intermediary                                                     | <i>L. kmetyi</i>         | -               | -             | -         | -       | -               | -             | -         | -       | -               | -             | -         | -       |
|                                                                  | <i>L. wolffii</i>        | 39              | 62            | 98        | 0.49    | -               | -             | -         | -       | -               | -             | -         | -       |
|                                                                  | <i>L. licerasiae</i>     | 40              | 60            | 97        | 0.49    | -               | -             | -         | -       | 35              | 61            | 89        | 0.43    |
|                                                                  | <i>L. inadai</i>         | -               | -             | -         | -       | -               | -             | -         | -       | 28              | 52            | 94        | 0.38    |
|                                                                  | <i>L. fainei</i>         | -               | -             | -         | -       | -               | -             | -         | -       | -               | -             | -         | -       |
| Saprophytic                                                      | <i>L. broomii</i>        | -               | -             | -         | -       | -               | -             | -         | -       | -               | -             | -         | -       |
|                                                                  | <i>L. wolbachii</i>      | 42              | 63            | 98        | 0.51    | -               | -             | -         | -       | 31              | 52            | 91        | 0.38    |
|                                                                  | <i>L. meyeri</i>         | 76              | 89            | 100       | 0.83    | -               | -             | -         | -       | -               | -             | -         | -       |
|                                                                  | <i>L. biflexa</i>        | 44              | 64            | 99        | 0.53    | -               | -             | -         | -       | 29              | 55            | 91        | 0.38    |
|                                                                  | <i>L. vanthelii</i>      | 75              | 88            | 100       | 0.82    | 37              | 57            | 99        | 0.47    | 30              | 53            | 91        | 0.38    |
|                                                                  | <i>L. terpstrae</i>      | -               | -             | -         | -       | -               | -             | -         | -       | 26              | 51            | 91        | 0.35    |
| <i>L. yanagawae</i>                                              | 42                       | 62              | 98            | 0.51      | -       | -               | -             | -         | -       | -               | -             | -         |         |

Conservation values (C-value) were expressed as a frequency between 0 and 1. The colors indicate: ■ very high conserved ( $0.85 \leq C\text{-value} \leq 1.0$ ); ■ high conserved ( $0.7 \leq C\text{-value} \leq 0.84$ ); ■ medium conserved ( $0.4 \leq C\text{-value} \leq 0.69$ ); ■ low conserved ( $C\text{-value} \leq 0.39$ ); ■ no hits. Positives or cover values below 50% were discharged.

**Table S4:** BLAST analysis of VapCs of *L. licerasiae* serovar Varillal strain VAR010.

| Leptospira spp           | LEP105CIBS_0307-VapC-1 |               |           |         | LEP105CIBS_0418-VapC-2 |               |           |         | LEP105CIBS_0630-VapC-3 |               |           |         | LEP105CIBS_1923-VapC-4 |               |           |         | LEP105CIBS_2251-VapC-5 |               |           |         | LEP105CIBS_2580-VapC-6 |               |           |         | LEP105CIBS_3193-VapC-7 |               |           |         | LEP105CIBS_3530-VapC-8 |               |           |         | LEP105CIBS_3550-VapC-9 |               |           |         | LEP105CIBS_3555-VapC-10 |               |           |         | LEP105CIBS_3557-VapC-11 |               |           |         | LEP105CIBS_3561-VapC-12 |               |           |         | LEP105CIBS_3566-VapC-14 |    |      |      | Leptospira spp |    |      |      |                          |    |      |      |    |    |      |      |                       |
|--------------------------|------------------------|---------------|-----------|---------|------------------------|---------------|-----------|---------|------------------------|---------------|-----------|---------|------------------------|---------------|-----------|---------|------------------------|---------------|-----------|---------|------------------------|---------------|-----------|---------|------------------------|---------------|-----------|---------|------------------------|---------------|-----------|---------|------------------------|---------------|-----------|---------|-------------------------|---------------|-----------|---------|-------------------------|---------------|-----------|---------|-------------------------|---------------|-----------|---------|-------------------------|----|------|------|----------------|----|------|------|--------------------------|----|------|------|----|----|------|------|-----------------------|
|                          | Identity (%)           | Positives (%) | Cover (%) | C-value | Identity (%)           | Positives (%) | Cover (%) | C-value | Identity (%)           | Positives (%) | Cover (%) | C-value | Identity (%)           | Positives (%) | Cover (%) | C-value | Identity (%)           | Positives (%) | Cover (%) | C-value | Identity (%)           | Positives (%) | Cover (%) | C-value | Identity (%)           | Positives (%) | Cover (%) | C-value | Identity (%)           | Positives (%) | Cover (%) | C-value | Identity (%)           | Positives (%) | Cover (%) | C-value | Identity (%)            | Positives (%) | Cover (%) | C-value | Identity (%)            | Positives (%) | Cover (%) | C-value | Identity (%)            | Positives (%) | Cover (%) | C-value |                         |    |      |      |                |    |      |      |                          |    |      |      |    |    |      |      |                       |
| <i>L. interrogans</i>    | 28                     | 79            | 0.48      | 0.35    | 54                     | 99            | 0.65      | 0.59    | 85                     | 100           | 0.53      | 0.77    | 87                     | 97            | 0.30      | 0.60    | 77                     | 77            | 0.54      | 0.80    | 79                     | 83            | 0.64      | 0.79    | 87                     | 99            | 0.78      | 0.82    | 87                     | 99            | 0.78      | 0.82    | 87                     | 99            | 0.78      | 0.82    | 87                      | 99            | 0.78      | 0.82    | 87                      | 99            | 0.78      | 0.82    | 87                      | 99            | 0.78      | 0.82    | 87                      | 99 | 0.78 | 0.82 | 87             | 99 | 0.78 | 0.82 | 87                       | 99 | 0.78 | 0.82 | 87 | 99 | 0.78 | 0.82 | <i>L. interrogans</i> |
| <i>L. kirschneri</i>     | -                      | -             | -         | -       | -                      | -             | -         | -       | -                      | -             | -         | -       | -                      | -             | -         | -       | -                      | -             | -         | -       | -                      | -             | -         | -       | -                      | -             | -         | -       | -                      | -             | -         | -       | -                      | -             | -         | -       | -                       | -             | -         | -       | -                       | -             | -         | -       | -                       | -             | -         | -       | -                       | -  | -    | -    | -              | -  | -    | -    | <i>L. kirschneri</i>     |    |      |      |    |    |      |      |                       |
| <i>L. noguchii</i>       | -                      | -             | -         | -       | -                      | -             | -         | -       | -                      | -             | -         | -       | -                      | -             | -         | -       | -                      | -             | -         | -       | -                      | -             | -         | -       | -                      | -             | -         | -       | -                      | -             | -         | -       | -                      | -             | -         | -       | -                       | -             | -         | -       | -                       | -             | -         | -       | -                       | -             | -         | -       | -                       | -  | -    | -    | -              | -  | -    | -    | <i>L. noguchii</i>       |    |      |      |    |    |      |      |                       |
| <i>L. borgpetersenii</i> | -                      | -             | -         | -       | -                      | -             | -         | -       | -                      | -             | -         | -       | -                      | -             | -         | -       | -                      | -             | -         | -       | -                      | -             | -         | -       | -                      | -             | -         | -       | -                      | -             | -         | -       | -                      | -             | -         | -       | -                       | -             | -         | -       | -                       | -             | -         | -       | -                       | -             | -         | -       | -                       | -  | -    | -    | -              | -  | -    | -    | <i>L. borgpetersenii</i> |    |      |      |    |    |      |      |                       |
| <i>L. weilii</i>         | -                      | -             | -         | -       | -                      | -             | -         | -       | -                      | -             | -         | -       | -                      | -             | -         | -       | -                      | -             | -         | -       | -                      | -             | -         | -       | -                      | -             | -         | -       | -                      | -             | -         | -       | -                      | -             | -         | -       | -                       | -             | -         | -       | -                       | -             | -         | -       | -                       | -             | -         | -       | -                       | -  | -    | -    | -              | -  | -    | -    | <i>L. weilii</i>         |    |      |      |    |    |      |      |                       |
| <i>L. santarosai</i>     | -                      | -             | -         | -       | -                      | -             | -         | -       | -                      | -             | -         | -       | -                      | -             | -         | -       | -                      | -             | -         | -       | -                      | -             | -         | -       | -                      | -             | -         | -       | -                      | -             | -         | -       | -                      | -             | -         | -       | -                       | -             | -         | -       | -                       | -             | -         | -       | -                       | -             | -         | -       | -                       | -  | -    | -    | -              | -  | -    | -    | <i>L. santarosai</i>     |    |      |      |    |    |      |      |                       |
| <i>L. alexanderi</i>     | -                      | -             | -         | -       | -                      | -             | -         | -       | -                      | -             | -         | -       | -                      | -             | -         | -       | -                      | -             | -         | -       | -                      | -             | -         | -       | -                      | -             | -         | -       | -                      | -             | -         | -       | -                      | -             | -         | -       | -                       | -             | -         | -       | -                       | -             | -         | -       | -                       | -             | -         | -       | -                       | -  | -    | -    | -              | -  | -    | -    | <i>L. alexanderi</i>     |    |      |      |    |    |      |      |                       |
| <i>L. wolbachii</i>      | 55                     | 71            | 0.86      | 0.65    | 31                     | 53            | 0.40      | 0.48    | -                      | -             | -         | -       | -                      | -             | -         | -       | -                      | -             | -         | -       | -                      | -             | -         | -       | -                      | -             | -         | -       | -                      | -             | -         | -       | -                      | -             | -         | -       | -                       | -             | -         | -       | -                       | -             | -         | -       | -                       | -             | -         | -       | -                       | -  | -    | -    | -              | -  | -    | -    | <i>L. wolbachii</i>      |    |      |      |    |    |      |      |                       |
| <i>L. biflexa</i>        | -                      | -             | -         | -       | -                      | -             | -         | -       | -                      | -             | -         | -       | -                      | -             | -         | -       | -                      | -             | -         | -       | -                      | -             | -         | -       | -                      | -             | -         | -       | -                      | -             | -         | -       | -                      | -             | -         | -       | -                       | -             | -         | -       | -                       | -             | -         | -       | -                       | -             | -         | -       | -                       | -  | -    | -    | -              | -  | -    | -    | <i>L. biflexa</i>        |    |      |      |    |    |      |      |                       |
| <i>L. terpestrae</i>     | -                      | -             | -         | -       | -                      | -             | -         | -       | -                      | -             | -         | -       | -                      | -             | -         | -       | -                      | -             | -         | -       | -                      | -             | -         | -       | -                      | -             | -         | -       | -                      | -             | -         | -       | -                      | -             | -         | -       | -                       | -             | -         | -       | -                       | -             | -         | -       | -                       | -             | -         | -       | -                       | -  | -    | -    | -              | -  | -    | -    | <i>L. terpestrae</i>     |    |      |      |    |    |      |      |                       |
| <i>L. yanagawa</i>       | -                      | -             | -         | -       | -                      | -             | -         | -       | -                      | -             | -         | -       | -                      | -             | -         | -       | -                      | -             | -         | -       | -                      | -             | -         | -       | -                      | -             | -         | -       | -                      | -             | -         | -       | -                      | -             | -         | -       | -                       | -             | -         | -       | -                       | -             | -         | -       | -                       | -             | -         | -       | -                       | -  | -    | -    | -              | -  | -    | -    | <i>L. yanagawa</i>       |    |      |      |    |    |      |      |                       |

Conservation values (C-value) were expressed as a frequency between 0 and 1. The colors indicate: ■ very high conserved (0.85 ≤ C-value ≤ 1.0); ■ high conserved (0.7 ≤ C-value ≤ 0.84); ■ medium conserved (0.4 ≤ C-value ≤ 0.69); ■ low conserved (C-value ≤ 0.39); ■ no hits. Positives or cover values below 50% were discharged.

**Table S5:** BLAST analysis of VapCs of *L. biflexa* serovar Patoc 1(Ames).

| Leptospira spp           | LBF_0418 VapC-1 |               |           |         | LBF_2142 VapC-2 |               |           |         | LBF_2175 VapC-3 |               |           |         | LBF_2183 VapC-4 |               |           |         | LBF_2185 VapC-5 |               |           |         | LBF_2276 VapC-6 |               |           |         | LBF_2813 VapC-7 |               |           |         | LBF_3285 VapC-8 |               |           |         |     |     |     |      |     |     |     |      |     |     |     |      |     |     |     |      |
|--------------------------|-----------------|---------------|-----------|---------|-----------------|---------------|-----------|---------|-----------------|---------------|-----------|---------|-----------------|---------------|-----------|---------|-----------------|---------------|-----------|---------|-----------------|---------------|-----------|---------|-----------------|---------------|-----------|---------|-----------------|---------------|-----------|---------|-----|-----|-----|------|-----|-----|-----|------|-----|-----|-----|------|-----|-----|-----|------|
|                          | Identity (%)    | Positives (%) | Cover (%) | C-value | Identity (%)    | Positives (%) | Cover (%) | C-value | Identity (%)    | Positives (%) | Cover (%) | C-value | Identity (%)    | Positives (%) | Cover (%) | C-value | Identity (%)    | Positives (%) | Cover (%) | C-value | Identity (%)    | Positives (%) | Cover (%) | C-value | Identity (%)    | Positives (%) | Cover (%) | C-value | Identity (%)    | Positives (%) | Cover (%) | C-value |     |     |     |      |     |     |     |      |     |     |     |      |     |     |     |      |
| <i>L. interrogans</i>    | 28              | 55            | 96        | 0.40    | 52              | 72            | 96        | 0.60    | -               | -             | -         | -       | 73              | 86            | 98        | 0.78    | 63              | 83            | 99        | 0.72    | 76              | 89            | 100       | 0.83    | 78              | 88            | 100       | 0.83    | 51              | 71            | 96        | 0.59    | 73  | 86  | 98  | 0.78 |     |     |     |      |     |     |     |      |     |     |     |      |
| <i>L. kirschneri</i>     | 28              | 55            | 96        | 0.40    | -               | -             | -         | -       | -               | -             | -         | -       | 74              | 86            | 98        | 0.78    | 47              | 66            | 97        | 0.55    | -               | -             | -         | -       | 77              | 89            | 100       | 0.83    | 65              | 82            | 96        | 0.73    | 77  | 89  | 100 | 0.83 |     |     |     |      |     |     |     |      |     |     |     |      |
| <i>L. noguchii</i>       | -               | -             | -         | -       | 55              | 73            | 96        | 0.61    | -               | -             | -         | -       | 72              | 86            | 98        | 0.77    | 41              | 58            | 97        | 0.48    | 39              | 56            | 98        | 0.47    | 49              | 68            | 93        | 0.54    | 44              | 63            | 97        | 0.52    | 49  | 68  | 93  | 0.54 |     |     |     |      |     |     |     |      |     |     |     |      |
| <i>L. borgpetersenii</i> | 27              | 51            | 90        | 0.35    | -               | -             | -         | -       | 44              | 63            | 94        | 0.60    | 76              | 89            | 94        | 0.78    | 48              | 66            | 97        | 0.55    | 84              | 93            | 100       | 0.89    | -               | -             | -         | -       | 65              | 82            | 99        | 0.73    | 48  | 66  | 97  | 0.55 |     |     |     |      |     |     |     |      |     |     |     |      |
| <i>L. weilii</i>         | 31              | 52            | 100       | 0.42    | 51              | 71            | 96        | 0.59    | 54              | 74            | 94        | 0.60    | 72              | 88            | 97        | 0.78    | 75              | 90            | 100       | 0.83    | 84              | 93            | 100       | 0.89    | 78              | 88            | 100       | 0.83    | 66              | 82            | 99        | 0.73    | 78  | 88  | 100 | 0.83 |     |     |     |      |     |     |     |      |     |     |     |      |
| <i>L. santarosai</i>     | 28              | 53            | 100       | 0.41    | 55              | 74            | 96        | 0.62    | -               | -             | -         | -       | 74              | 86            | 98        | 0.78    | 70              | 88            | 99        | 0.78    | 35              | 78            | 98        | 0.55    | 49              | 64            | 93        | 0.53    | 68              | 84            | 99        | 0.75    | 49  | 64  | 93  | 0.53 |     |     |     |      |     |     |     |      |     |     |     |      |
| <i>L. alexanderi</i>     | 27              | 51            | 90        | 0.35    | 52              | 71            | 96        | 0.59    | 53              | 74            | 94        | 0.60    | 72              | 87            | 97        | 0.77    | 63              | 83            | 99        | 0.72    | 83              | 92            | 100       | 0.88    | 78              | 90            | 100       | 0.84    | 65              | 81            | 99        | 0.72    | 83  | 92  | 100 | 0.88 |     |     |     |      |     |     |     |      |     |     |     |      |
| <i>L. olstoni</i>        | -               | -             | -         | -       | -               | -             | -         | -       | 54              | 72            | 94        | 0.59    | 73              | 89            | 97        | 0.79    | 63              | 83            | 99        | 0.72    | 77              | 92            | 100       | 0.85    | 78              | 88            | 100       | 0.83    | 65              | 82            | 99        | 0.73    | 77  | 92  | 100 | 0.85 |     |     |     |      |     |     |     |      |     |     |     |      |
| <i>L. kmetyi</i>         | -               | -             | -         | -       | -               | -             | -         | -       | -               | -             | -         | -       | -               | -             | -         | -       | -               | -             | -         | -       | -               | -             | -         | -       | -               | -             | -         | -       | -               | -             | -         | -       | -   | -   | -   | -    | -   | -   | -   | -    | -   | -   | -   | -    | -   | -   | -   | -    |
| <i>L. wolffii</i>        | -               | -             | -         | -       | -               | -             | -         | -       | -               | -             | -         | -       | -               | -             | -         | -       | 43              | 65            | 97        | 0.52    | 37              | 54            | 96        | 0.44    | 75              | 88            | 98        | 0.80    | 65              | 86            | 99        | 0.75    | 43  | 65  | 97  | 0.52 |     |     |     |      |     |     |     |      |     |     |     |      |
| <i>L. licerasiae</i>     | 38              | 52            | 97        | 0.44    | -               | -             | -         | -       | -               | -             | -         | -       | 65              | 78            | 79        | 0.56    | 71              | 89            | 100       | 0.80    | 72              | 87            | 99        | 0.79    | 77              | 90            | 98        | 0.82    | 47              | 68            | 96        | 0.55    | 72  | 87  | 99  | 0.79 |     |     |     |      |     |     |     |      |     |     |     |      |
| <i>L. inadai</i>         | 29              | 53            | 100       | 0.41    | -               | -             | -         | -       | -               | -             | -         | -       | 56              | 72            | 98        | 0.63    | 70              | 87            | 100       | 0.79    | 33              | 55            | 74        | 0.33    | 75              | 88            | 98        | 0.80    | 42              | 62            | 96        | 0.50    | 33  | 55  | 74  | 0.33 |     |     |     |      |     |     |     |      |     |     |     |      |
| <i>L. fainei</i>         | -               | -             | -         | -       | -               | -             | -         | -       | -               | -             | -         | -       | -               | -             | -         | -       | -               | -             | -         | -       | -               | -             | -         | -       | -               | -             | -         | -       | 73              | 88            | 98        | 0.79    | -   | -   | -   | -    |     |     |     |      |     |     |     |      |     |     |     |      |
| <i>L. broomii</i>        | 29              | 55            | 100       | 0.42    | -               | -             | -         | -       | -               | -             | -         | -       | -               | -             | -         | -       | -               | -             | -         | -       | -               | -             | -         | -       | -               | -             | -         | -       | -               | -             | -         | -       | -   | -   | -   | -    | -   | -   | -   | -    | -   | -   | -   | -    |     |     |     |      |
| <i>L. wolbachii</i>      | 29              | 51            | 100       | 0.40    | 91              | 96            | 100       | 0.94    | 99              | 99            | 100       | 0.99    | 81              | 95            | 100       | 0.88    | 89              | 95            | 100       | 0.92    | 36              | 57            | 97        | 0.45    | 83              | 91            | 100       | 0.87    | 87              | 97            | 100       | 0.92    | 36  | 57  | 97  | 0.45 |     |     |     |      |     |     |     |      |     |     |     |      |
| <i>L. meyeri</i>         | 31              | 54            | 100       | 0.43    | 93              | 97            | 100       | 0.95    | 95              | 97            | 100       | 0.96    | 93              | 98            | 100       | 0.96    | 77              | 90            | 100       | 0.84    | 95              | 98            | 100       | 0.97    | 48              | 63            | 93        | 0.52    | 84              | 97            | 100       | 0.91    | 77  | 90  | 100 | 0.84 |     |     |     |      |     |     |     |      |     |     |     |      |
| <i>L. biflexa</i>        | 100             | 100           | 100       | 1.00    | 100             | 100           | 100       | 1.00    | 100             | 100           | 100       | 1.00    | 100             | 100           | 100       | 1.00    | 100             | 100           | 100       | 1.00    | 100             | 100           | 100       | 1.00    | 100             | 100           | 100       | 1.00    | 100             | 100           | 100       | 1.00    | 100 | 100 | 100 | 1.00 | 100 | 100 | 100 | 1.00 | 100 | 100 | 100 | 1.00 | 100 | 100 | 100 | 1.00 |
| <i>L. vanthielii</i>     | 31              | 54            | 100       | 0.43    | 93              | 97            | 100       | 0.95    | -               | -             | -         | -       | 85              | 96            | 100       | 0.91    | 44              | 68            | 100       | 0.56    | 95              | 98            | 100       | 0.97    | 50              | 65            | 93        | 0.53    | 88              | 97            | 100       | 0.93    | 44  | 68  | 100 | 0.56 |     |     |     |      |     |     |     |      |     |     |     |      |
| <i>L. terpestrae</i>     | -               | -             | -         | -       | -               | -             | -         | -       | -               | -             | -         | -       | 87              | 94            | 100       | 0.91    | -               | -             | -         | -       | -               | -             | -         | -       | -               | -             | -         | -       | -               | -             | -         | -       | -   | -   | -   | -    | -   | -   | -   | -    | -   | -   | -   | -    | -   | -   | -   | -    |
| <i>L. yanagawa</i>       | -               | -             | -         | -       | 93              | 97            | 100       | 0.95    | 96              | 98            | 100       | 0.97    | -               | -             | -         | -       | 47              | 70            | 97        | 0.57    | 37              | 53            | 97        | 0.44    | 50              | 65            | 93        | 0.53    | 92              | 97            | 100       | 0.95    | 47  | 70  | 97  | 0.57 |     |     |     |      |     |     |     |      |     |     |     |      |

Conservation values (C-value) were expressed as a frequency between 0 and 1. The colors indicate: ■ very high conserved (0.85 ≤ C-value ≤ 1.0); ■ high conserved (0.7 ≤ C-value ≤ 0.84); ■ medium conserved (0.4 ≤ C-value ≤ 0.69); ■ low conserved (C-value ≤ 0.39); ■ no hits. Positives or cover values below 50% were discharged.

**Table S6:** Conservation of the VapCs of *L. interrogans* serovar Copenhageni strain Fiocruz L1-130 with some human pathogenic bacteria

| VapC of <i>L. interrogans</i> serovar Copenhageni str. Fiocruz L1-130 |                 |               |           |         |                 |               |           |         |                 |               |           |         |                 |               |           |         |
|-----------------------------------------------------------------------|-----------------|---------------|-----------|---------|-----------------|---------------|-----------|---------|-----------------|---------------|-----------|---------|-----------------|---------------|-----------|---------|
| Pathogenic Bacteria                                                   | LIC10866 VapC-1 |               |           |         | LIC12116 VapC-2 |               |           |         | LIC12660 VapC-3 |               |           |         | LIC12713 VapC-4 |               |           |         |
|                                                                       | Identity (%)    | Positives (%) | Cover (%) | C-value | Identity (%)    | Positives (%) | Cover (%) | C-value | Identity (%)    | Positives (%) | Cover (%) | C-value | Identity (%)    | Positives (%) | Cover (%) | C-value |
| <i>Escherichia coli</i>                                               | -               | -             | -         | -       | -               | -             | -         | -       | 40              | 65            | 98        | 0.51    | 29              | 56            | 94        | 0.40    |
| <i>Klebsiella pneumoniae</i>                                          | -               | -             | -         | -       | -               | -             | -         | -       | 40              | 60            | 98        | 0.49    | -               | -             | -         | -       |
| <i>Mycobacterium tuberculosis</i>                                     | -               | -             | -         | -       | 41              | 55            | 96        | 0.46    | -               | -             | -         | -       | -               | -             | -         | -       |
| <i>Neisseria gonorrhoeae</i>                                          | -               | -             | -         | -       | -               | -             | -         | -       | -               | -             | -         | -       | -               | -             | -         | -       |
| <i>Neisseria meningitidis</i>                                         | -               | -             | -         | -       | -               | -             | -         | -       | -               | -             | -         | -       | 38              | 53            | 92        | 0.42    |
| <i>Proteus mirabilis</i>                                              | -               | -             | -         | -       | -               | -             | -         | -       | 45              | 63            | 98        | 0.53    | -               | -             | -         | -       |
| <i>Pseudomonas aeruginosa</i>                                         | 36              | 56            | 93        | 0.43    | -               | -             | -         | -       | 38              | 62            | 98        | 0.49    | -               | -             | -         | -       |
| <i>Serratia marcescens</i>                                            | -               | -             | -         | -       | -               | -             | -         | -       | 42              | 60            | 98        | 0.50    | 40              | 54            | 92        | 0.43    |
| <i>Shigella sonnei</i>                                                | -               | -             | -         | -       | -               | -             | -         | -       | 38              | 63            | 98        | 0.49    | -               | -             | -         | -       |
| <i>Staphylococcus aureus</i>                                          | -               | -             | -         | -       | -               | -             | -         | -       | 34              | 55            | 99        | 0.44    | -               | -             | -         | -       |
| <i>Streptococcus pneumoniae</i>                                       | -               | -             | -         | -       | 39              | 55            | 60        | 0.28    | 42              | 65            | 98        | 0.52    | -               | -             | -         | -       |
| <i>Vibrio cholerae</i>                                                | -               | -             | -         | -       | -               | -             | -         | -       | 34              | 62            | 97        | 0.47    | -               | -             | -         | -       |

Conservation values (C-value) were expressed as a frequency between 0 and 1. The colors indicate:  medium conserved ( $0.4 \leq C\text{-value} \leq 0.69$ );  low conserved ( $C\text{-value} \leq 0.39$ );  no hits. Positives or cover values below 50% were discharged.
